# Supplementary material for: Monitoring the Establishment of VOC Gamma in Minas Gerais, Brazil: A Retrospective Epidemiological and Genomic Surveillance Study
Source: MDPI journal article supplement (doi:10.3390/v14122747), 2022-12-09
Supplement: s1 [file s1]

# Regional Health Units - Minas Gerais

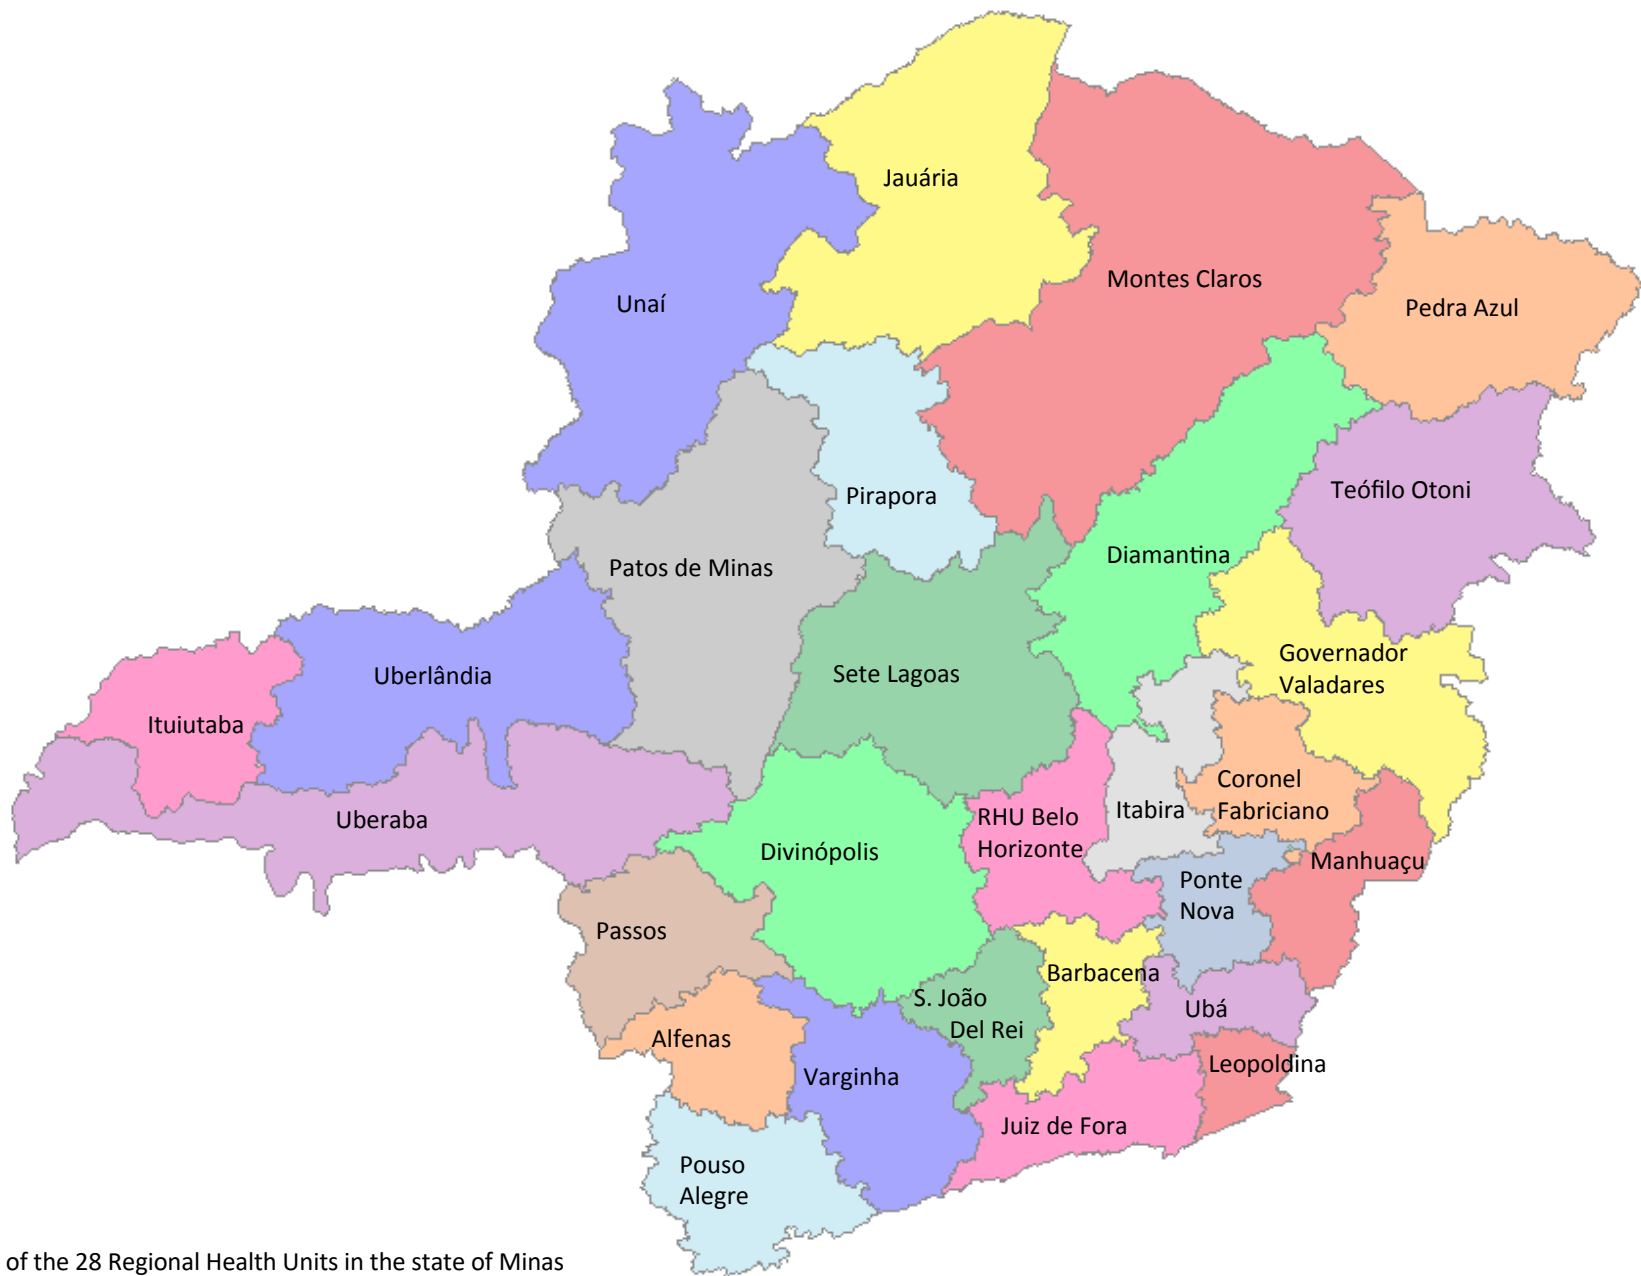

Supplementary Figure S1. Representation of the 28 Regional Health Units in the state of Minas Gerais, distributed among the macro-regions of the state.
